# Supplementary material
Source: PubMed Central journal article supplement (PMC3289365)
Supplement: 1114297109_pnas.201114297SI.pdf [file 1114297109_pnas.201114297SI.pdf]

# Supporting Information

Thyssen et al. 10.1073/pnas.1114297109

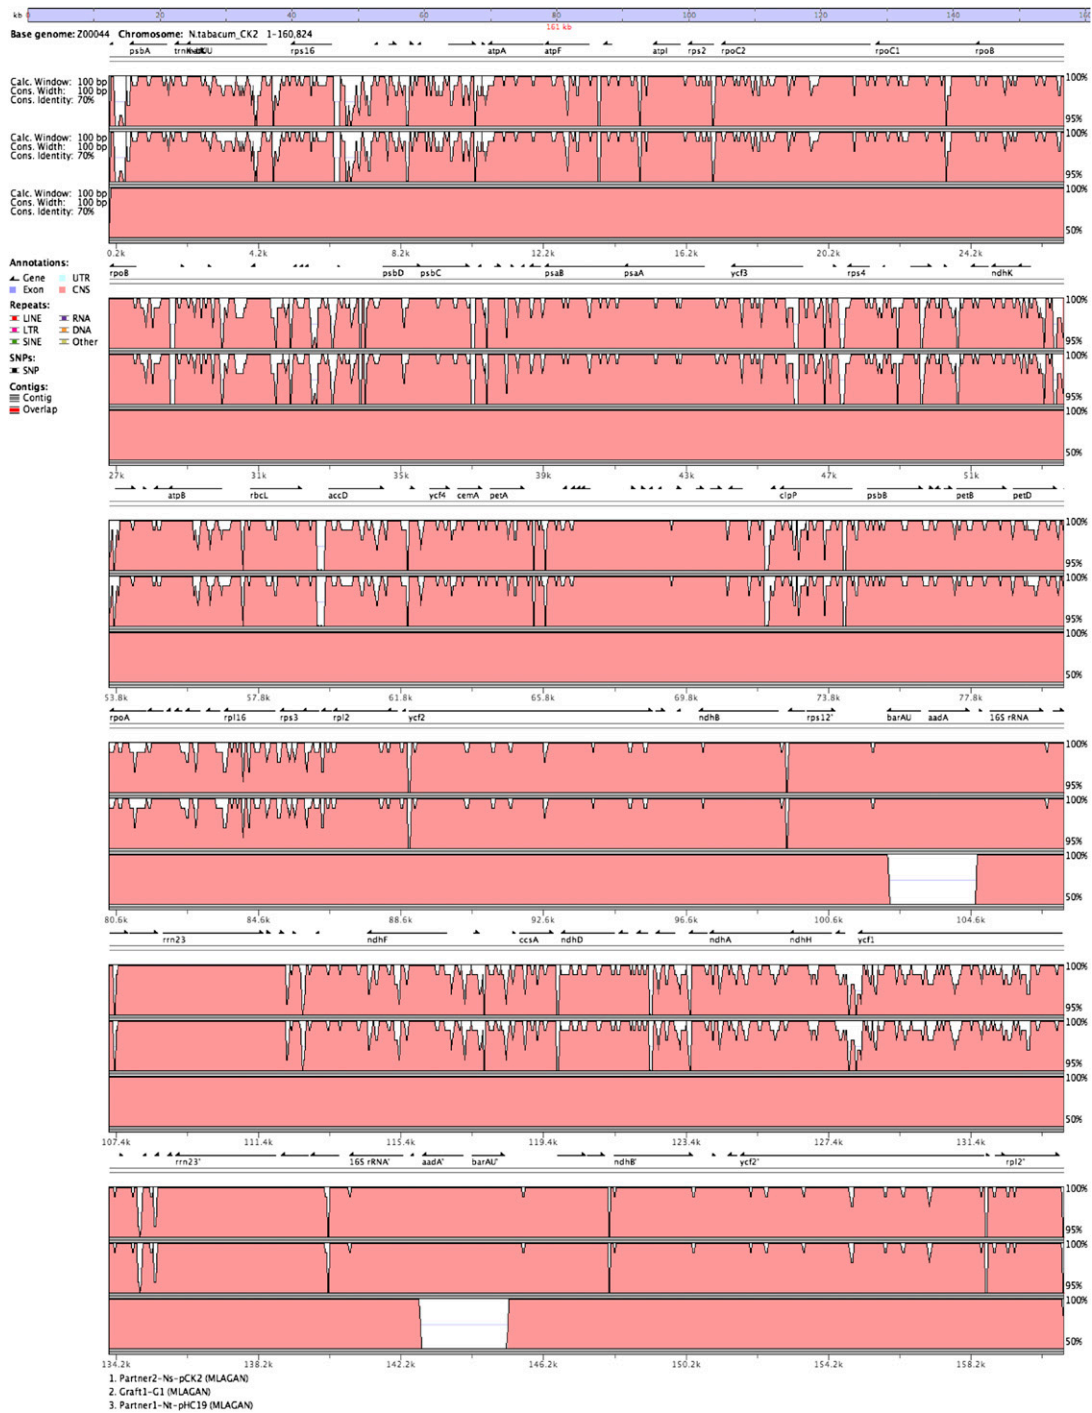

Fig. S1. Identification of the *N. undulata* plastids in the PGT plants. mVISTA-based identity plots (100-bp sliding window) showing sequence identity between sequenced chloroplast genomes of the transplastomic P2 partner carrying *N. undulata* ptDNA (u) and the *aadA* and *bar<sup>au</sup>* transgenes (GenBank accession no. JN563930) (Top); the G1, G3, and G4 (G) PGT plants (Middle); and the P1 partner *N. tabacum* ptDNA (t) (GenBank accession no. Z00044) (Bottom) as the reference. Shown above the map are the positions of the genes.

**Table S1. Plastid primers for testing ptDNA polymorphic sites between *N. tabacum* and *N. undulata***

| Pair | Primer | Position | Strand | Gene             | Sequence                        |
|------|--------|----------|--------|------------------|---------------------------------|
| *1   | 12upF  | 12907    | F      | <i>atpF</i>      | TCTTACTTAGAATAGGTCGTCGATTTCAGCA |
| *1   | 14upR  | 14098    | R      | <i>atpF</i>      | CCACTGATTTCTGCCGCTTCCGTT        |
| *2   | 27upF  | 27875    | F      | <i>rpoB-trnC</i> | ACACATTCCAACCTGCTGAATACCA       |
| *2   | 29upR  | 29210    | R      | <i>rpoB-trnC</i> | TCTTCGCCCCCTTCCACAACAT          |
| *3   | 48upF  | 48971    | F      | <i>trnL</i>      | GAGACATTCTCCGCTTTCAGGCG         |
| *3   | 49upR  | 49945    | R      | <i>trnL</i>      | TGGAACCGCTAAGGAAAGGGGGTC        |
| *4   | 60upF  | 60806    | F      | <i>accD</i>      | AACGGCATTCCCCTAGCAATTGGG        |
| *4   | 62upR  | 62222    | R      | <i>accD</i>      | GGATGAGATTGGGTCCCAGCGGAT        |
| *5   | 83upF  | 83888    | F      | <i>ndhF</i>      | TTCCACCACGACGTGCATTTCTGT        |
| *5   | 85upR  | 85414    | R      | <i>ndhF</i>      | TACAAATTGCGGGGCGTATCGACG        |
| *6   | 111upF | 111916   | F      | <i>ndhE-ndhG</i> | TCGGAAGAAAGGTGGGATCCGGAC        |
| *6   | 113upR | 113293   | R      | <i>ndhE-ndhG</i> | TGGTATGGGGTCTTATCGAAGCGC        |

F, forward; R, reverse.

**Table S2. Mitochondrial primers for testing mtDNA polymorphic sites between *N. tabacum* and *N. undulata***

| Pair | Primer   | Position | Strand | Gene                | Sequence              |
|------|----------|----------|--------|---------------------|-----------------------|
| 1    | mt-0-F   | 690      | F      | <i>orf125a</i>      | CCCCGCCAGTAGTCCTCT    |
| 1    | mt-4-R   | 4334     | R      | <i>orf125a</i>      | CCGCGGGCATCGCGATAAGT  |
| 2    | mt-100-F | 100070   | F      | <i>orf129b</i>      | CGGCCATCTGGTCTCAGGA   |
| 2    | mt-104-R | 104811   | R      | <i>orf129b</i>      | TGGGGACTCGCACGAGGAGG  |
| 3    | mt-180-F | 180316   | F      | <i>nad4</i>         | GGCAGGAGCGCAACGACCTT  |
| 3    | mt-183-R | 183813   | R      | <i>nad4</i>         | AGTCGGGTTGCTCACGCAGC  |
| 4    | mt-201-F | 201586   | F      | <i>nad2</i>         | TGGTGTGCTTCTGCTCGCG   |
| 4    | mt-204-R | 204759   | R      | <i>nad2</i>         | TTTCTCCGTGCCCCGTTCCGC |
| 5    | mt-222-F | 222140   | F      | <i>nad5</i>         | AGGTCCCCGTAGTAGCCGG   |
| 5    | mt-226-R | 226463   | R      | <i>nad5</i>         | TTGGGCTTGGCTCTGCTCGC  |
| 6    | mt-306-F | 306203   | F      | <i>orf115-ccmFc</i> | CACGACTCCCCCTCTCCCCG  |
| 6    | mt-309-R | 309623   | R      | <i>orf115-ccmFc</i> | TGCCCGATTCCCCGACCCAT  |

F, forward; R, reverse.

**Table S3. Plastid primers for PCR amplification of the *N. tabacum* and *N. undulata* plastid genomes**

| Pair | Primer | Position | Strand | Gene          | Sequence                   |
|------|--------|----------|--------|---------------|----------------------------|
| 1    | 0F     | 14       | F      | <i>trnH</i>   | ACGGGAATTGAACCCGCGCA       |
| 1    | 4R     | 4410     | R      | <i>trnK</i>   | CGGGTTGCTAACTCAACGG        |
| 2    | 3F     | 3704     | F      | <i>trnK</i>   | TCAAATGATACATAGTGCGATACA   |
| 2    | 8R     | 8653     | R      | <i>trnS</i>   | CGAATCCCTCTCTTCCG          |
| 3    | 7F     | 7989     | F      | <i>psbK</i>   | GCCTTTGTTGGCAAGCTGCTGTAAG  |
| 3    | 12R    | 12042    | R      | <i>atpA</i>   | GGCATTGCTCGTATTCACGGTCTTG  |
| 4    | 11F    | 11052    | F      | <i>atpA</i>   | CCACTCTGGAAACGGAGATAACC    |
| 4    | 16R    | 16791    | R      | <i>rps2</i>   | CTCGTTTTTATCAGAAGCTTGTG    |
| 5    | 15F    | 15267    | F      | <i>atpI</i>   | GATGGCCCTCCATGGATTCACC     |
| 5    | 20R    | 20888    | R      | <i>rpoC2</i>  | GAGGATTAATGTCAGATCCTCAAGG  |
| 6    | 19F    | 19971    | F      | <i>rpoC2</i>  | GATAGACATCGGTACTCCAGTGC    |
| 6    | 24R    | 24612    | R      | <i>rpoB</i>   | GTTACACAACAACCCCTTAGAGG    |
| 7    | 24F    | 24069    | F      | <i>rpoC1</i>  | GCACAAATCCGCTTTTATAGG      |
| 7    | 29R    | 29568    | R      | <i>ycf6</i>   | GCCCAAGCAAGACTTACTATATCCAT |
| 8    | 28F    | 28849    | F      | <i>trnC</i>   | CCAGTTCAAATCCGGGTGTC       |
| 8    | 34R    | 34493    | R      | <i>psbD</i>   | TACCAAGGGCTATAGTCAT        |
| 9    | 33F    | 33186    | F      | <i>trnT</i>   | GCCCTTTAACTCAGTGGTA        |
| 9    | 38R    | 38115    | R      | <i>trnG</i>   | AACCCGCATCTTCTCCTTGG       |
| 10   | 37F    | 37147    | F      | <i>trnS</i>   | GAGAGAGAGGGATTCCGAACC      |
| 10   | 43R    | 43484    | R      | <i>psaA</i>   | TTCGTTCCGGGAACCAGAA        |
| 11   | 41F    | 41267    | F      | <i>psaA</i>   | AAGAATGCCCATGTTGTGGC       |
| 11   | 46R    | 46162    | R      | <i>ycf3</i>   | CCTATTACAGAGATGGTGCGATTT   |
| 12   | 45F    | 45083    | F      | <i>ycf3</i>   | CGATGCATATGTAGAAAGCC       |
| 12   | 51R    | 51022    | R      | <i>ndhJ</i>   | TTTTTATGAAATACAAGATGCTC    |
| 13   | 49F    | 49312    | F      | <i>trnL</i>   | CGAAATCGGTAGACGCTACG       |
| 13   | 54R    | 54971    | R      | <i>atpE</i>   | GAAGGAAGGAGACAAAAAATTGAGGC |
| 14   | 53F    | 53776    | F      | <i>trnV</i>   | CGAACCGTAGACCTTCTCGG       |
| 14   | 58R    | 58198    | R      | <i>rbcl</i>   | GTAAAATCAAGTCCACCGCG       |
| 15   | 57F    | 57272    | F      | <i>atpB</i>   | TCTAGATTTACATATACAACAT     |
| 15   | 62R    | 62754    | R      | <i>ycf4</i>   | CTAATAAGAAGCCTAATGAACC     |
| 16   | 61F    | 61145    | F      | <i>accD</i>   | GCAGGTAAAAGAGTAATTGAAC     |
| 16   | 66R    | 66664    | R      | <i>psbL</i>   | TACTCATTTTTGTACTTGCTGT     |
| 17   | 65F    | 65219    | F      | <i>petA</i>   | GCATCTGTTATTTGGCACA        |
| 17   | 71R    | 71704    | R      | <i>clpP</i>   | ACCATAGAAACGAAGGAACCCACT   |
| 18   | 70F    | 70727    | F      | <i>rps18</i>  | GCTCGTATTTATCTTTGTTACC     |
| 18   | 76R    | 76301    | R      | <i>psbB</i>   | CCCCTGGACTGCTACGAAAAACACC  |
| 19   | 74F    | 74963    | F      | <i>psbB</i>   | TGCCTTGGTATCGTGTCATAC      |
| 19   | 78R    | 78846    | R      | <i>petB</i>   | CCCAGAAATACCTTGTTTACG      |
| 20   | 77F    | 77212    | F      | <i>psbH</i>   | TGGGGAACACTCCTTTGAT        |
| 20   | 82R    | 82676    | R      | <i>rps8</i>   | CGAGGTATAATGACAGACCGAG     |
| 21   | 81F    | 81880    | F      | <i>rpl36</i>  | ATTCTACGTGCACCCCTTACG      |
| 21   | 86R    | 86576    | R      | <i>rps19</i>  | GGGCATCTACCATTATACCC       |
| 22   | 85F    | 85864    | F      | <i>rps3</i>   | AGTCTGAAACCAAGTGGATTTATT   |
| 22   | 89R    | 89311    | R      | <i>YCF2</i>   | GAAGATACAGGAGCGAAACAATCAAC |
| 23   | 88F    | 88062    | F      | <i>rpl2</i>   | GCTTATGACCTCCCCCTCTATGC    |
| 23   | 93R    | 93140    | R      | <i>YCF2</i>   | TCTTCTAGAGAATCTCCTAATTGTTT |
| 24   | 91F    | 91131    | F      | <i>YCF2</i>   | CTTCAATATGGAATTCAAAGGGATC  |
| 24   | 97R    | 97636    | R      | <i>ndhB</i>   | CTCAAACAAGCATGAAACGTATGC   |
| 25   | 96F    | 96469    | f      | <i>trnL</i>   | GAGATTTTGAGTCTCGCGTGC      |
| 25   | 100R   | 100782   | R      | <i>rps12</i>  | TCACTGCTTATATACCCGGTATTGGC |
| 26   | 99F    | 99552    | F      | <i>rps7</i>   | GTGCAAAAGCTCTATTTGCCTCTGCC |
| 26   | 104R   | 104797   | R      | <i>oriA</i>   | ATCGAAAGTTGGATCTACATTGGATC |
| 27   | 103F   | 103454   | F      | <i>rrn16</i>  | CGACTGACTGAGAGACGAAAGC     |
| 27   | 108R   | 108280   | R      | <i>rrn23</i>  | CGCTACCTTAGGACCGTTATAGTTAC |
| 28   | 107F   | 107056   | F      | <i>rrn23</i>  | GAAACTAAGTGGAGTCCGAACCGAC  |
| 28   | 111R   | 111882   | R      | <i>ORF350</i> | AGTGGATCCCTCTTGTCTCTTTAG   |
| 29   | 110F   | 110672   | F      | <i>trnN</i>   | ACAGCCGACCGCTCTACCCTGAGC   |
| 29   | 114R   | 114269   | R      | <i>ndhF</i>   | GGATCATACCTTTTCACTTCC      |
| 30   | 113F   | 113036   | F      | <i>ndhF</i>   | ATTTTCATCTTTGGACCAAAAAAAGC |
| 30   | 119R   | 119286   | R      | <i>psaC</i>   | GCTAAACAAATTGCTTCTGCTCC    |
| 31   | 117F   | 117227   | F      | <i>ycf5</i>   | GGTCAATCTTTTAGGAATAGGGTTAC |
| 31   | 123R   | 123506   | R      | <i>ndhA</i>   | GGACTTCTTATGTCGGGATATGGATC |

**Table S3. Cont.**

| Pair | Primer | Position | Strand | Gene        | Sequence                   |
|------|--------|----------|--------|-------------|----------------------------|
| 32   | 122F   | 122194   | F      | <i>ndhA</i> | CTGCGCTTCCACTATATCAACTGTAC |
| 32   | 128R   | 128835   | R      | <i>ycf1</i> | TGAAACCTTGGCATATATCT       |
| 33   | 127F   | 127391   | F      | <i>ycf1</i> | AATTCGAGGTTCTTATTTACT      |
| 33   | 132R   | 132957   | R      | <i>trnR</i> | GACGATACTGTAGGGGAGGTC      |
| 34   | 154F   | 154629   | F      | <i>rpl2</i> | CCATAGAATACGACCCTAAT       |
| 34   | 1R     | 1533     | R      | <i>psbA</i> | CTAGCACTGAAAACCGTCTT       |

F, forward; R, reverse.

**Table S4. Nuclear SSR primers**

| Chromosome | Primer  | Strand | Sequence                    |
|------------|---------|--------|-----------------------------|
| 1          | PT30307 | F      | AAAGAAGCACGGTCAAATAGG       |
| 1          | PT30307 | R      | GCAACAACAAGGTGCATGG         |
| 2          | PT30242 | F      | TGTGTACTACCGCCTACTGC        |
| 2          | PT30242 | R      | TTCTGCTAAACCGATCGTGG        |
| 3b         | PT30205 | F      | GGTCGATCCACAATTTAAACG       |
| 3b         | PT30205 | R      | GCACTTGCTCCTTTGTACCC        |
| 4          | PT30272 | F      | GAACCTAACCTCGCTCCACA        |
| 4          | PT30272 | R      | AAATGGTAGCTGCGAGGAGA        |
| 5          | PT30471 | F      | GTCTGTACCTTCGCCAAAGC        |
| 5          | PT30471 | R      | TCCTCAGAGAACTCCAGCGT        |
| 6          | PT30087 | F      | CTTCTCCTAAGCCGAGGGT         |
| 6          | PT30087 | R      | TTGATGATAGAACGCAACTCG       |
| 7          | PT30138 | F      | AGTTGCAGGATTGTTGCTT         |
| 7          | PT30138 | R      | CGACTGCAAGAGTTGGCAAT        |
| 8a         | PT30167 | F      | TGATACAGAATATGGCGAACTTT     |
| 8a         | PT30167 | R      | CCGCTTCATCATTGAGGTTT        |
| 9          | PT30140 | F      | AAGATGGCATATGGGATTGG        |
| 9          | PT30140 | R      | TGAATCGGAGGAAGTGAATG        |
| 10         | PT30482 | F      | CTTCTCTCCACCGCAGAC          |
| 10         | PT30482 | R      | ACAGTTGGATATGGTGGCGT        |
| 11         | PT30008 | F      | CGTTGCTTAGTCTCGCACTG        |
| 11         | PT30008 | R      | GGTTGATCCGACACTATTACGA      |
| 12         | PT30098 | F      | TTGTTGCTCTCTCGAGTTCTTT      |
| 12         | PT30098 | R      | GCAGTCGACTCATTGGCA          |
| 13         | PT30342 | F      | GACAACAATCAGTAAAGGAAACGA    |
| 13         | PT30342 | R      | AATGCAAGACCTGTCAACC         |
| 13         | PT30420 | F      | AACAAACCGCTTCCATTCT         |
| 13         | PT30420 | R      | GAATTAGGCGCTTTGGGAAT        |
| 14a        | PT30175 | F      | TTAGGCGGCGGTATTCTTAT        |
| 14a        | PT30175 | R      | TATGCCTCAATCCCTTACGC        |
| 15         | PT30463 | F      | AAGCTGCCCTAGCTCAATCA        |
| 15         | PT30463 | R      | AACATCACCATTTCCACAAGTTT     |
| 16         | PT30412 | F      | CATTTAGCCGGGAACATTCA        |
| 16         | PT30412 | R      | CATGGGATACACACGCAAAG        |
| 17         | PT30274 | F      | TGACAGCTAAGCTAATAACAGTAAATG |
| 17         | PT30274 | R      | GGACTTTGGAGTGTCAAATGC       |
| 18         | PT30111 | F      | AGCCAGCCACCAAATTTATC        |
| 18         | PT30111 | R      | GGAACATTGCTCAAGCCCTA        |
| 19         | PT30230 | F      | TTTCTTCTGTCTGATGCTTCAAT     |
| 19         | PT30230 | R      | TTGTCCATCTCACTTGCTGC        |
| 20         | PT20286 | F      | ACGCTAGAGCATCCAACA          |
| 20         | PT20286 | R      | TAGTAAAAGGCAAGCAGG          |
| 21         | PT30378 | F      | TCAAATGAGGGTTGTAGCCA        |
| 21         | PT30378 | R      | TGCAATGGCTACACAAGAAGA       |
| 22         | PT30168 | F      | TTGAACCAATTGCGGTAA          |
| 22         | PT30168 | R      | AAATTCTTGGGTCAATGGTGG       |
| 23         | PT30231 | F      | AGGAGGCGAAGAAAAGAGGAG       |
| 23         | PT30231 | R      | CCCATGAATTCGTAACAGCA        |
| 24         | PT40024 | F      | AATGTCTGCCAATCGAAAG         |
| 24         | PT40024 | R      | CGAATAACGACACTCGAACG        |

F, forward; R, reverse.
